# Supplementary material
Source: PubMed Central journal article supplement (PMC6825307)
Supplement: pnas.1910412116.sapp.pdf [file pnas.1910412116.sapp.pdf]

# PNAS

[www.pnas.org](http://www.pnas.org)

Supplementary Information for

Myeloid cells activate iNKT cells to produce IL-4 in the thymic medulla

Haiguang Wang, Elise R. Breed, You Jeong Lee, Lily J. Qian, Stephen C. Jameson, Kristin A. Hogquist\*

Kristin A. Hogquist  
Email: [hogqu001@umn.edu](mailto:hogqu001@umn.edu)

**This PDF file includes:**

Supplementary text  
Figures S1 to S11  
Tables S1 to S2

## Supplementary Material and Methods

### Mice

B6 (C57BL/6NCR) mice were purchased from the National Cancer Institute. BALB/cBYJ, CD45.1<sup>+</sup>/CD45.1<sup>+</sup> BALB/cBYJ (CByJ.SJL(B6)-Ptpcr/J), Cd1d<sup>-/-</sup> BALB/c (C.129S2-Cd1tm1Gru/J), Cd1d<sup>fl/fl</sup> B6 (C57BL/6-Cd1d1tm1.1Aben/J), FoxN1Cre B6 (B6(Cg)-Foxn1tm3(cre)Nrm/J), MB1Cre B6 (B6.C(Cg)-Cd79atm1(cre)Reth/EhobJ), CD11cCre B6 (B6.Cg-Tg(Itgax-cre)1-1Reiz/J), Zbtb46Cre B6 (B6.Cg-Zbtb46tm3.1(cre)Mnz/J), BDCA2-DTR B6 (C57BL/6-Tg(CLEC4C-HBEGF)956Cln/J) mice were obtained from the Jackson Laboratory. KN2 BALB/cBYJ, Nur77<sup>GFP</sup> BALB/c and KN2 B6 mice have been previously described (1). LysMCre<sup>+</sup> Csf1r<sup>L<sup>SL</sup>-DTR</sup> B6 mice were kindly provided by Dr. Marc Jenkins at University of Minnesota. CD45.1<sup>+</sup> CD45.2<sup>+</sup> KN2 BALB/cBYJ, Nur77<sup>GFP</sup> KN2 BALB/c, FoxN1Cre<sup>+</sup> Cd1d<sup>fl/fl</sup> KN2 F1, MB1Cre<sup>+</sup> Cd1d<sup>fl/fl</sup> KN2 F1, CD11cCre<sup>+</sup> Cd1d<sup>fl/fl</sup> KN2 F1, Zbtb46Cre<sup>+</sup> Cd1d<sup>fl/fl</sup> KN2 F1, BDCA2-DTR<sup>+</sup> KN2 F1, LysMCre<sup>+</sup> Csf1r<sup>L<sup>SL</sup>-DTR</sup> KN2 F1, LysMCre<sup>+</sup> Csf1r<sup>L<sup>SL</sup>-DTR</sup> F1 mice as well as littermate control mice for each strain were generated through crossbreeding at University of Minnesota. Cd1d<sup>fl/fl</sup> KN2 BALB/c mice were generated through using Cd1d<sup>fl/fl</sup> B6 mice backcrossed to KN2 BALB/c mice for at least 10 generations at University of Minnesota.

### Diphtheria toxin treatment

BDCA2-DTR F1 and littermate control mice were injected intraperitoneally (i.p.) with diphtheria toxin (DT) every other day for 9 days (5 injections in total, 500ng of DT in 100µL PBS for the 1<sup>st</sup> injection on 1<sup>st</sup> day, 100ng of DT in 100µL PBS for all subsequent injections). LysMCre<sup>+</sup> Csf1r<sup>L<sup>SL</sup>-DTR</sup> F1 and littermate control mice were injected i.p. with diphtherial toxin (DT) every other day for 9 days (5 injections in total, 100ng of DT in 100µL PBS for the all 5 injections). Mice were used the day after the last injections.

### Intra-thymic transfer

iNKT enriched thymocytes were prepared through depletion of CD8<sup>+</sup> and CD24<sup>+</sup> cells (via immunomagnetic selection [Miltenyi]) in thymocytes from CD45.1<sup>+</sup> CD45.2<sup>+</sup> KN2 BALB/cBYJ mice. Intra-thymic transfers were performed on congenic host mice through ultrasound imaging guidance. Ultrasound imaging guided intra-thymic transfer is described in detail previously (2).

### Bone marrow chimera

Bone marrow cells were directly flushed out from the femurs and tibias of donor mice (BALB/c Wt or BALB/c Cd1d<sup>-/-</sup>) and depleted of T cells via immunomagnetic depletion (Miltenyi) of CD8<sup>+</sup> and CD3<sup>+</sup> cells. Recipient mice (BALB/c Wt or BALB/c Cd1d<sup>-/-</sup>) received a total lethal dose of 600 rads. Irradiations were done in 2 doses (300 rads each) separated by a period of 3-4 hours. 2 hours after the second irradiation, recipient mouse received at least 4×10<sup>6</sup> of T-cell-depleted bone marrow donor cells through intravenous injection via tail vein. Bone marrow chimeras were used at 8 weeks after introduction of bone marrow donor cells.

### Enrichment of iNKT cells

Thymocytes were prepared in single cell suspension and incubated with PE-CD1d-PBS57 tetramer at 4°C for 30 min followed by immunomagnetic enrichment using anti-PE microbeads per manufacturer's instructions (Miltenyi).

### Preparation of lymphocytes and flow cytometric analysis

Thymocytes were prepared in single cell suspension through mashing thymi and filtering through 70 µm cell strainers (FALCON), or digestion with collagenase D (1 mg/mL) at 37°C for 30 min before mashing and filtration through 70 µm cell strainers. The thymic epithelial cells were prepared as previously described (3). Cells were incubated with Fc block (Tonbo) and mouse serum (Jackson ImmunoResearch) for 15 min at 4°C before staining with antibodies to surface markers and viability dye (Tonbo) for 45 min at 4°C. For intracellular staining of transcription factors, cells were fixed and permeabilized with a Foxp3 staining buffer kit (eBioscience) after staining with antibodies to surface markers, then were incubated with antibodies to transcription

factors in permeabilization buffer for 45 min at 4°C. Biotinylated PBS57 loaded or unloaded CD1d monomers were from the tetramer core of the US National Institutes of Health and tetramerized with streptavidin-PE at the ratio of 4:1. All antibodies were purchased from eBioscience, BD Biosciences or BioLegend, unless otherwise indicated. See SI Appendix, Suppl. Table 2 for a list of antibodies and other reagents used in this study. Samples were acquired on a BD LSR Fortessa or BD Fortessa X-20 and data were analyzed with FlowJo 10 (Treestar). Samples were SSC-A/FSC-A gated to exclude debris, SSC-A/SSC-W gated to select single cells, then gated to exclude viability dye<sup>+</sup> dead cells.

### **Immunofluorescence and histocytometric analysis**

For CD1d tetramer based immunofluorescence, the fresh thymic lobe was incubated with PE-CD1d-PBS57 tetramer (50 µL of 1×PBS containing 2% FBS + 2 µL of CD1d tetramer in 96 well plate) at 4°C overnight, then washed with PBS for 3 times, then fixed in 4% paraformaldehyde (PFA) at 4°C for 1 hour followed by incubation in 30% (w/v) sucrose for overnight. Tissues were further snap frozen in Optimal Cutting Temperature Compound (Tissue-Tek) and stored at -80°C before sectioning (5-7 µm) on a Cryostat (Leica). The immunofluorescence was performed in CAS block solution (Invitrogen) as follows: 1 hour blocking in CAS block solution at room temperature (RT), 2 hours incubation at RT with primary antibodies mixture including anti-PE antibody (Goat polyclonal to R Phycoerythrin, Abcam; or rabbit whole antisera, Novus Biologicals) and other antibodies, wash 3 times, 1 hour incubation at RT with secondary antibodies mixture (Donkey anti Goat AF555, Invitrogen; or Goat-anti-Rabbit-AF555, Invitrogen), wash 3 times, mount overnight in mounting media containing DAPI (ProLong® Diamond Antifade Mountant with DAPI). For human CD2 (huCD2) immunofluorescence, the tissue was stained with anti-huCD2 (RPA2) antibody followed by tyramide-based amplification per manufacturer's instructions (PerkinElmer). The images were collected on a Leica DM6000B Epi-Fluorescent microscope. The histocytometric analysis to quantify localization was performed in ImageJ, Flowjo and Prism as previously described (4, 5).

### **Author contributions**

H.W. designed and performed the research, analyzed the data, wrote and edited the paper. Y.J.L and L.J.Q performed the research. E.R.B contributed a new analytic tool and analyzed the data. S.C.J provided insights to the research. K.A.H designed and supervised the research, edited the paper.

### **Conflict of interest**

The authors declare no conflict of interest.

### **Acknowledgements**

We thank Ms. Jane Ding for expert technical assistance, Dr. Hristo Georgiev for critical reading of the manuscript as well as all present and past members in Hogquist & Jameson lab for insightful discussions. This work was supported by AI39560 (K.A.H.), F30 AI131483, T32 AI007313, and T32 GM008244 (E.R.B) and UMN dissertation fellowship (H.W.).

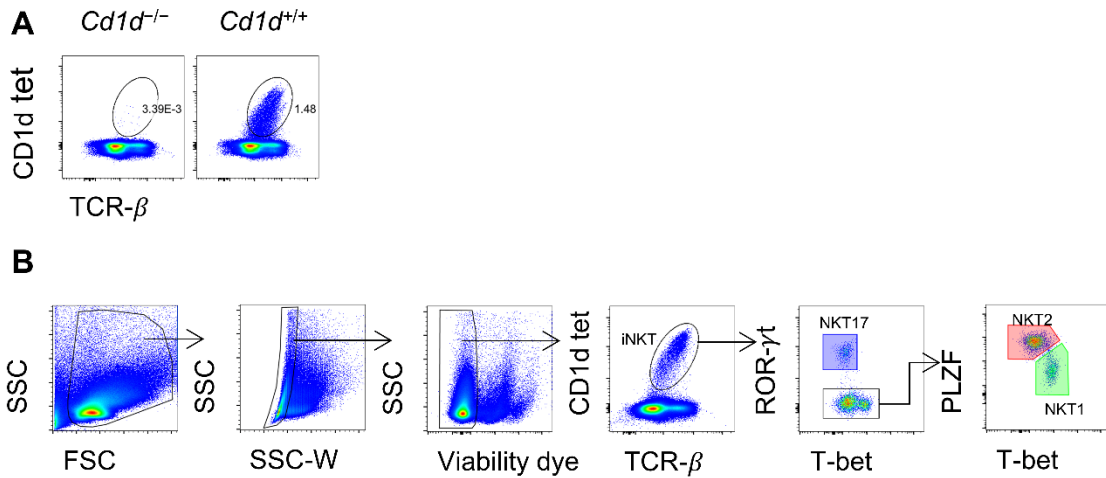

**Suppl. Figure 1. Detection and gating strategy of iNKT subsets.**

(A) Representative flowcytometry plots of PBS57-CD1d tetramer staining in thymocytes from BALB/c *Cd1d*<sup>-/-</sup> and *Cd1d*<sup>+/+</sup> mouse. (B) Flowcytometric gating strategy to identify thymic iNKT cells and iNKT subsets (NKT1, green; NKT2, red; NKT17, blue).



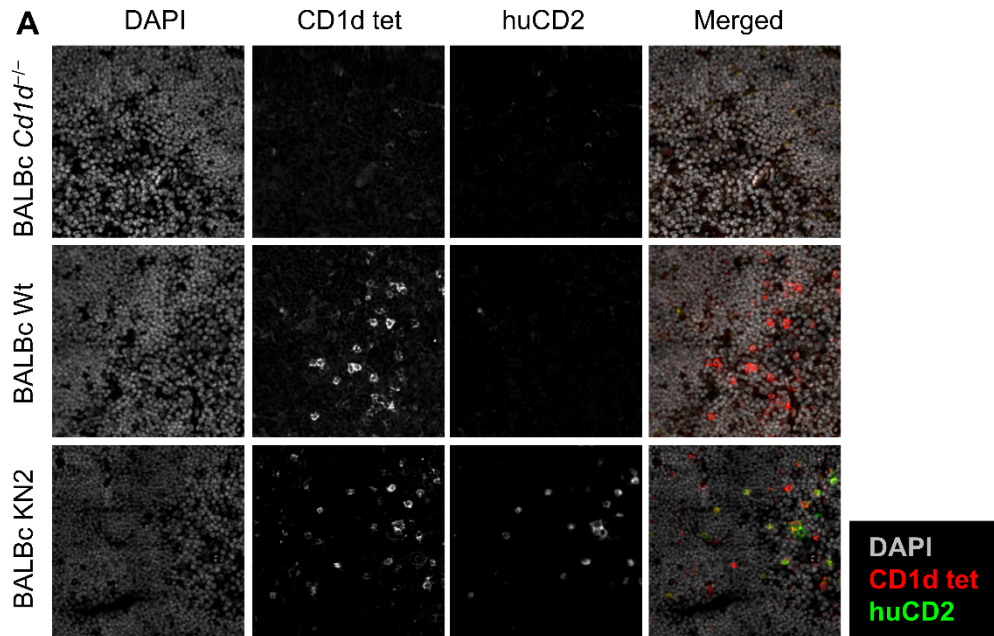

**Suppl. Figure 2. Specific detection of IL-4 producing NKT2 cells *in situ*.**  
 (A) Immunofluorescent microscopy of thymic sections of BALB/c  $Cd1d^{-/-}$ , Wt or KN2 mice, stained with DAPI, PBS57-CD1d tetramer and huCD2.

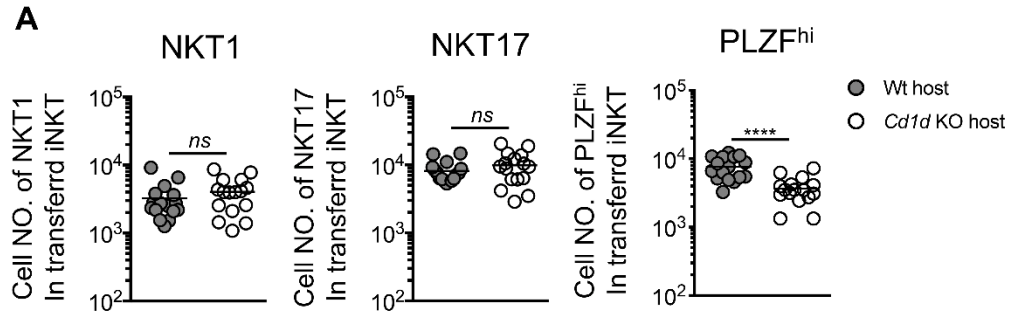

**Suppl. Figure 3. Intra-thymic transfer into *Cd1d*<sup>-/-</sup> host does NOT affect donor NKT1 & NKT17 in short term**

(A) Cell number of transferred donors NKT1 (left), NKT17 (middle) and PLZF<sup>hi</sup> iNKT (right) cells 9 days after intra-thymic transfer into BALB/c Wt or BALB/c *Cd1d* KO host mice. Data are pooled from 5 experiments. n=16 (BALB/c Wt), 16 (BALB/c *Cd1d* KO). Each dot represents an individual mouse and horizontal bars indicate mean values. Unpaired t test, <sup>ns</sup>p=0.3013 (NKT1) or 0.2534 (NKT17); \*\*\*\*p<0.0001 (PLZF<sup>hi</sup> iNKT).

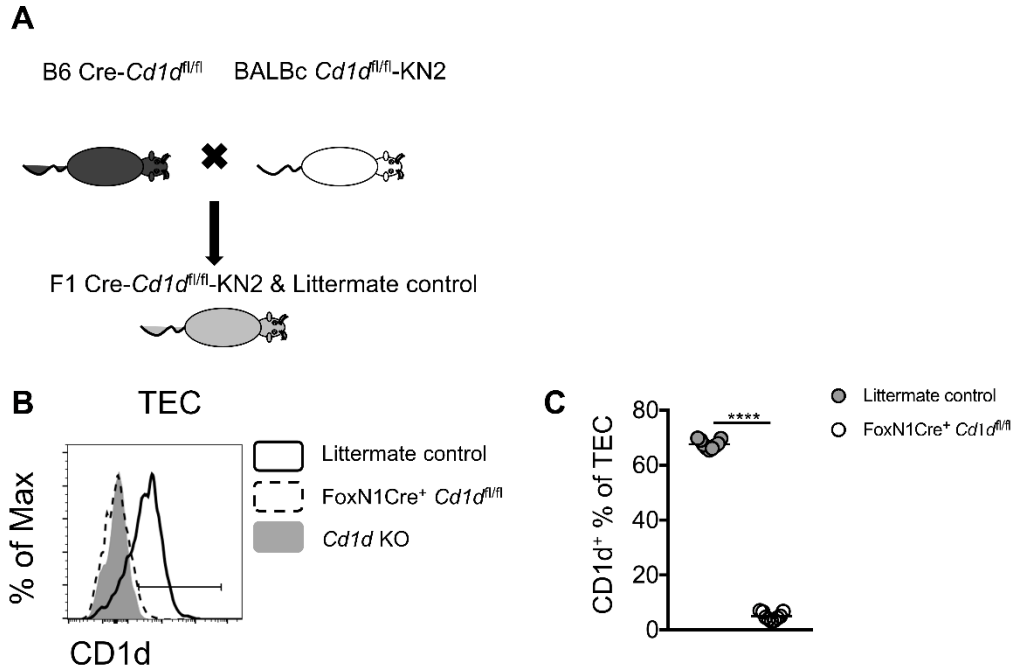

**Suppl. Figure 4. Experimental strategy of generating F1 Cre<sup>+</sup>-*Cd1d<sup>fl/fl</sup>*-KN2 mouse & targeting of *Cd1d* with FoxN1Cre**

(A) Experimental scheme showing generation of F1 Cre<sup>+</sup>-*Cd1d<sup>fl/fl</sup>*-KN2 or Littermate control mice through cross breeding of B6 Cre<sup>+</sup>-*Cd1d<sup>fl/fl</sup>* with BALB/c *Cd1d<sup>fl/fl</sup>*-KN2 mice. (B) Representative flowcytometry histogram showing expression of CD1d in thymic epithelial cells (TECs, EpCAM<sup>+</sup> CD45<sup>-</sup>) from F1 littermate control, F1 FoxN1Cre<sup>+</sup> *Cd1d<sup>fl/fl</sup>* and BALB/c *Cd1d* KO mice. (C) Frequency of CD1d<sup>+</sup> cells of TECs from F1 littermate control or F1 FoxN1Cre<sup>+</sup> *Cd1d<sup>fl/fl</sup>* mice. Each dot represents an individual mouse and horizontal bars indicate mean values. Data are pooled from 3 experiments. n=9 (Littermate control), 9 (FoxN1Cre<sup>+</sup> *Cd1d<sup>fl/fl</sup>*). Unpaired t test, \*\*\*\**p*<0.0001.

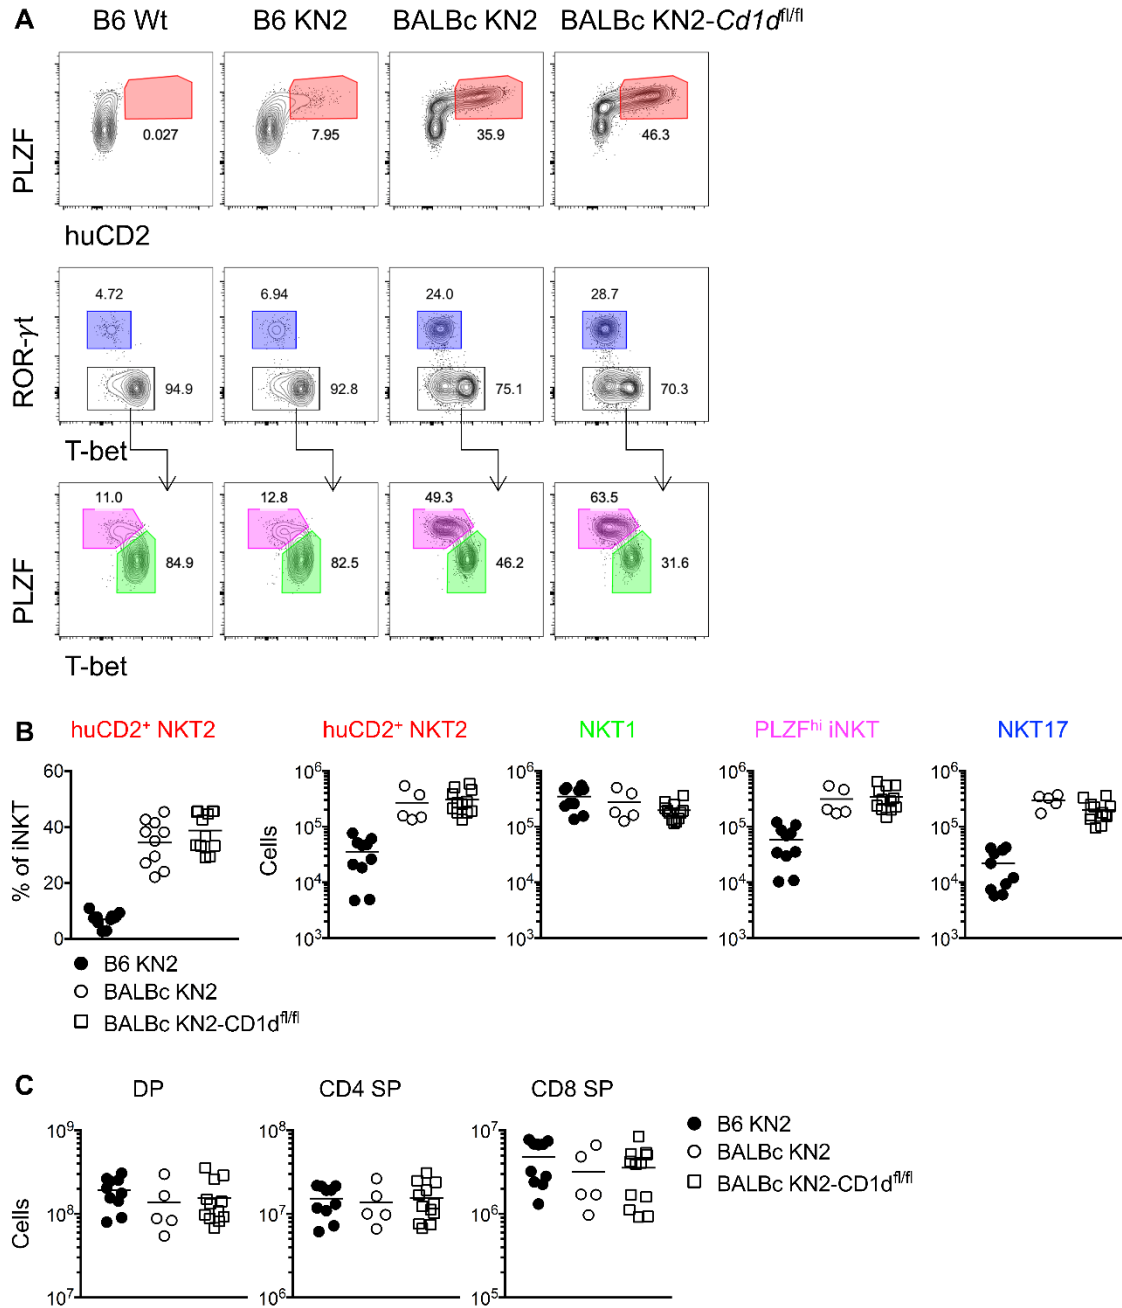

**Suppl. Figure 5. B6 *Cd1d*<sup>fl/fl</sup> mouse backcrossed to BALB/c KN2 mouse.**

(A) Expression of huCD2 and PLZF (upper row), T-bet and ROR- $\gamma$ t (middle row) in thymic iNKT cells, and expression of T-bet and PLZF in ROR- $\gamma$ t<sup>-</sup> (lower row) thymic iNKT cells from B6 Wt, B6 KN2, BALB/c KN2 and BALB/c *Cd1d*<sup>fl/fl</sup>-KN2 mice. (B) Frequency of huCD2<sup>+</sup> NKT2 cells (far left panel 1, red) and cell number of huCD2<sup>+</sup> NKT2 cells (panel 2, red), NKT1 cells (panel 3, green), PLZF<sup>high</sup> cells (panel 4, pink) and NKT17 cells (panel 5, blue) in thymic iNKT cells from B6 KN2, BALB/c KN2 or BALB/c *Cd1d*<sup>fl/fl</sup>-KN2 mice. Data are pooled from 4 (Frequency of huCD2<sup>+</sup> NKT2 cells) or 3 (Cell number of huCD2<sup>+</sup> NKT2, NKT1, PLZF<sup>high</sup>, NKT17 cells) experiments. n=10 (B6 KN2), 10 and 5 (BALB/c KN2), 12 (BALB/c KN2-*Cd1d*<sup>fl/fl</sup>). (C) Cell number of double positive (DP) (far left), CD4 single positive (SP) (middle) and CD8 single positive (SP) (far right) thymocytes from B6 KN2, BALB/c KN2 or BALB/c *Cd1d*<sup>fl/fl</sup>-KN2 mice. Data are pooled from 3 experiments. n=10 (B6 KN2), 5 (BALB/c KN2), 12 (BALB/c KN2-*Cd1d*<sup>fl/fl</sup>).

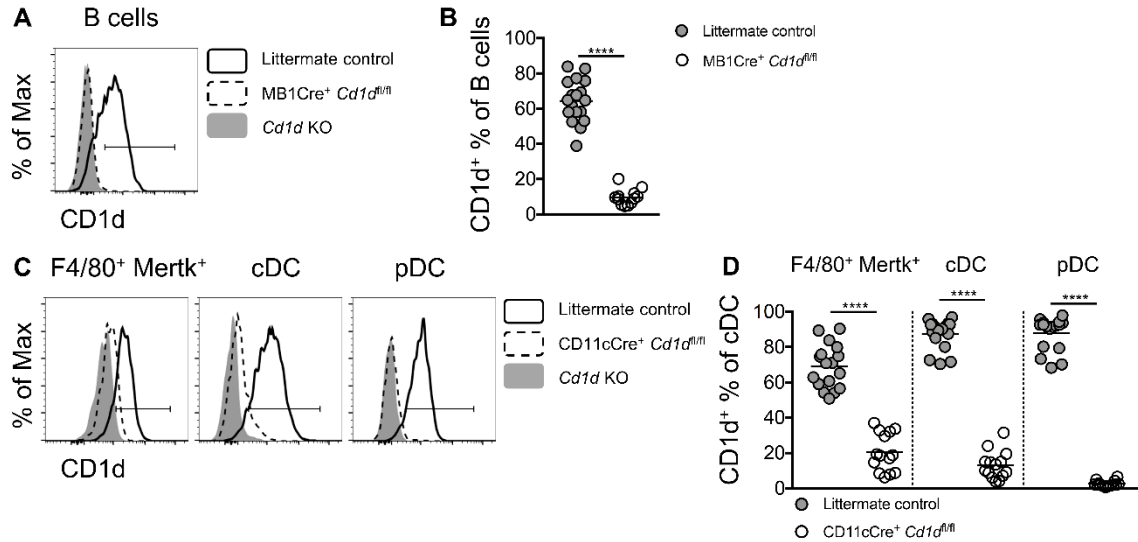

**Suppl. Figure 6. Targeting of *Cd1d* with MB1Cre & CD11cCre, respectively.**

(A) Representative flowcytometry histogram showing expression of CD1d in thymic B cells from F1 littermate control, F1 MB1Cre<sup>+</sup> *Cd1d*<sup>fl/fl</sup> and BALB/c *Cd1d* KO mice. (B) Frequency of CD1d<sup>+</sup> cells of thymic B cells from F1 littermate control or F1 MB1Cre<sup>+</sup> *Cd1d*<sup>fl/fl</sup> mice. Data are pooled from 5 experiments. n=18 (Littermate control), 12 (MB1Cre<sup>+</sup> *Cd1d*<sup>fl/fl</sup>). Each dot represents an individual mouse and horizontal bars indicate mean values. Unpaired t test, \*\*\*\**p*<0.0001. (C) Representative flowcytometry histogram showing expression of CD1d in thymic macrophages (F4/80<sup>+</sup> Mertk<sup>+</sup>, left), cDC (middle) and pDC (right) from F1 littermate control, F1 CD11cCre *Cd1d*<sup>fl/fl</sup> and BALB/c *Cd1d* KO mice. (D) Frequency of CD1d<sup>+</sup> cells of thymic macrophages (F4/80<sup>+</sup> Mertk<sup>+</sup>, left), cDC (middle) and pDC (right) from F1 littermate control or F1 CD11cCre<sup>+</sup> *Cd1d*<sup>fl/fl</sup> mice. Data are pooled from 7 experiments. n=17 (Littermate control), 14 (CD11cCre<sup>+</sup> *Cd1d*<sup>fl/fl</sup>). Each dot represents an individual mouse and horizontal bars indicate mean values. Unpaired t test, \*\*\*\**p*<0.0001.

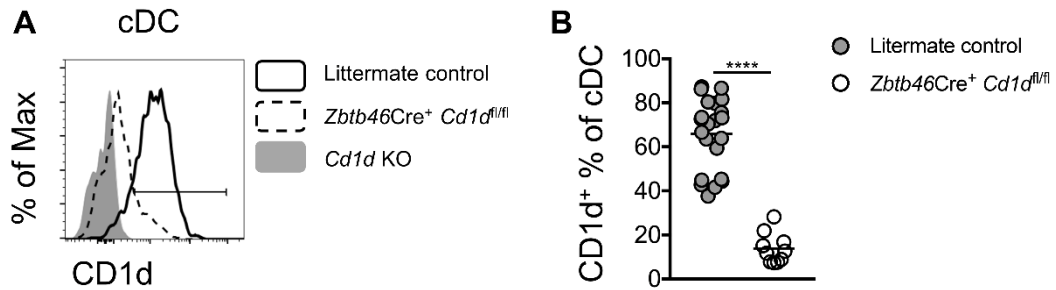

**Suppl. Figure 7. Targeting of *Cd1d* with *Zbtb46Cre*.**

(A) Representative flowcytometry histogram showing expression of CD1d in thymic cDC from F1 littermate control, F1  $Zbtb46Cre^+ Cd1d^{fl/fl}$  and BALB/c  $Cd1d$  KO mice. (B) Frequency of CD1d<sup>+</sup> cells of thymic cDC from F1 littermate control or F1  $Zbtb46Cre^+ Cd1d^{fl/fl}$  mice. Data are pooled from 7 experiments. n=22 (Littermate control), 10 ( $Zbtb46Cre^+ Cd1d^{fl/fl}$ ). Each dot represents an individual mouse and horizontal bars indicate mean values. Unpaired t test, \*\*\*\* $p < 0.0001$ .

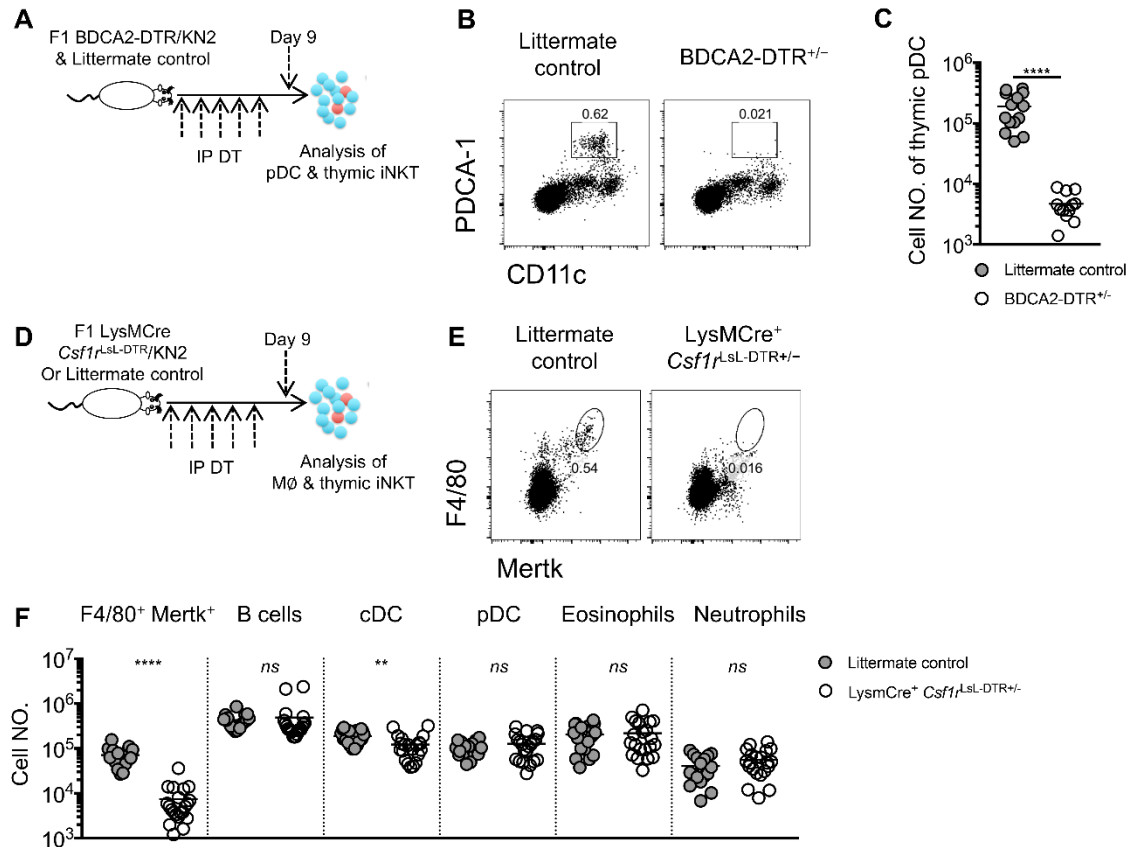

**Suppl. Figure 8. Depletion of pDC and macrophages/phagocytes in respective transgenic mouse models.**

(A) Experimental scheme showing the F1 littermate control and F1 BDCA2-DTR KN2 mice were injected intraperitoneally (i.p.) with DT every other day for 5 times in a 9-day course, and the thymic iNKT cells and pDC were analyzed at day 9. (B) Expression of CD11c and PDCA-1 in thymic cells and gating of pDC (CD11c<sup>intermediate</sup> PDCA-1<sup>+</sup>) from F1 littermate control and F1 BDCA2-DTR<sup>+/-</sup> KN2 mice after a 9-day course of DT treatment. (C) Cell number of thymic pDC in F1 littermate control and F1 BDCA2-DTR<sup>+/-</sup> KN2 mice after a 9-day course of DT treatment. Data are pooled from 3 experiments. n=14 (Littermate control), 12 (BDCA2-DTR<sup>+/-</sup>). Each dot represents an individual mouse and horizontal bars indicate mean values. Unpaired t test, \*\*\*\*p<0.0001. (D) Experimental scheme showing the F1 littermate control and F1 BDCA2-DTR KN2 mice were injected intraperitoneally (i.p.) with DT every other day for 5 times in a 9-day course, and the thymic iNKT cells and myeloid cells were analyzed at day 9. (E) Expression of Mertk and F4/80 in thymic cells and gating of macrophages/phagocytes (F4/80<sup>+</sup> Mertk<sup>+</sup>) from F1 littermate control and F1 LysMCre<sup>+</sup> Csf1r<sup>LSL-DTR</sup> KN2 mice after a 9-day course of DT treatment. (F) Cell number of thymic F4/80<sup>+</sup> Mertk<sup>+</sup> macrophages/phagocytes, B cells, cDC, pDC, eosinophils and neutrophils in F1 littermate control and F1 LysMCre<sup>+</sup> Csf1r<sup>LSL-DTR</sup> KN2 mice after a 9-day course of DT treatment. Data are pooled from 6 experiments. n=17 (Littermate control), 21 (LysMCre<sup>+</sup> Csf1r<sup>LSL-DTR</sup>). Each dot represents an individual mouse and horizontal bars indicate mean values. Unpaired t test, \*\*\*\*p<0.0001, \*\*p=0.0087, <sup>ns</sup>p=0.6902 (B cells), 0.2220 (pDC), 0.7613 (Eosinophil), 0.1556 (Neutrophil).

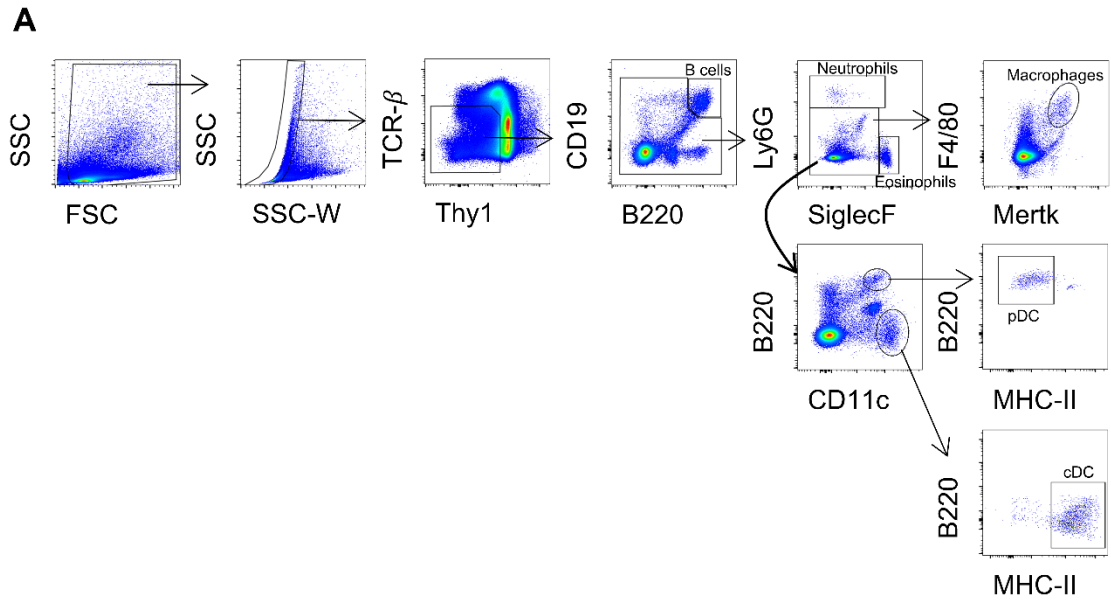

**Suppl. Figure 9. Gating strategy of myeloid cell populations in the thymus.**

(A) Flowcytometric gating strategy to identify thymic B cells ( $CD19^+ B220^+$ ), neutrophils ( $Ly6G^+ SiglecF^-$ ), eosinophils ( $Ly6G^-, SiglecF^+$ ), cDC ( $CD11c^{high}, MHC-II^{high}$ ), pDC ( $CD11c^{intermediate}, B220^+, MHC-II^{low}$ ) and macrophages/phagocytes ( $F4/80^+ Mertk^+$ ).



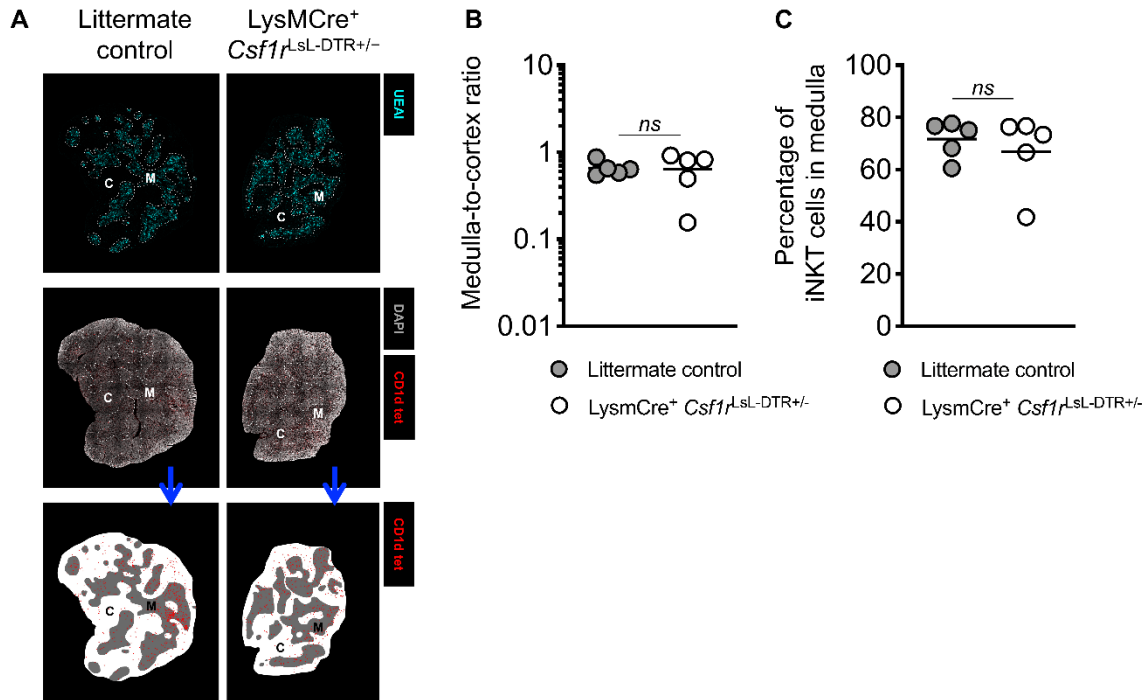

**Suppl. Figure 10. Depletion of macrophages does not disrupt thymic medulla-to-cortex ratio as well as localization of iNKT cells.**

(A) Immunofluorescent microscopy of thymic section of F1 littermate control and F1  $\text{LysMCre}^+ \text{Csf1r}^{\text{LsL-DTR}+/}$  mice after a 9-day course of DT treatment (upper row), stained with DAPI, UEA-I, CD1d tetramer, the white dash lines outline the UEA-I<sup>+</sup> medullary region. The staining of UEA-I (top row) was used to distinguish cortex (UEA-I<sup>-</sup>, marked as C) and medulla (UEA-I<sup>+</sup>, marked as M), outlined by the white dash line. The staining of DAPI and CD1d tetramer was used to identify iNKT cells (middle row). Localization of iNKT cells (DAPI<sup>+</sup> CD1d tetramer<sup>+</sup>) analyzed using histocytometric algorithm (bottom row). (B) Medulla-to-cortex ratio of the thymus from F1 littermate control and F1  $\text{LysMCre}^+ \text{Csf1r}^{\text{LsL-DTR}+/}$  mice after a 9-day course of DT treatment. The medulla-to-cortex ratio was calculated as  $(\text{UEA-I}^+ \text{ medulla area}) / (\text{total thymus area} - \text{UEA-I}^+ \text{ medulla area})$ . Data are from 1 experiment.  $n=5$  (littermate control), 5 ( $\text{LysMCre}^+ \text{Csf1r}^{\text{LsL-DTR}+/}$ ). Each dot represents an individual mouse and horizontal bars indicate mean values. Unpaired t test,  $^{ns}p=0.9070$ . (C) Percentage of CD1d tetramer<sup>+</sup> iNKT cells localized in thymic medulla from F1 littermate control and F1  $\text{LysMCre}^+ \text{Csf1r}^{\text{LsL-DTR}+/}$  mice after a 9-day course of DT treatment. Data are from 1 experiment.  $n=5$  (littermate control), 5 ( $\text{LysMCre}^+ \text{Csf1r}^{\text{LsL-DTR}+/}$ ). Each dot represents an individual mouse and horizontal bars indicate mean values. Unpaired t test,  $^{ns}p=0.5370$ .

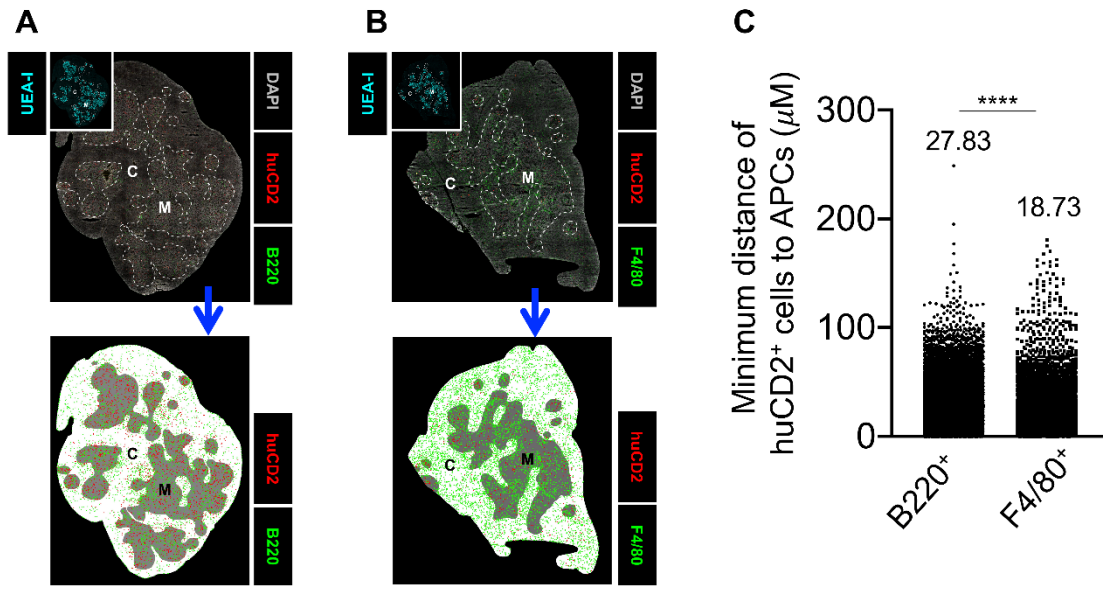

**Suppl. Figure 11. Localization of thymic IL-4<sup>+</sup> cells together with APCs, B220<sup>+</sup> or F4/80<sup>+</sup> cells.**

(A) Immunofluorescent microcopy of thymic section of BALB/c KN2 mice (upper row), stained with DAPI, UEA-I, huCD2 and B220, the white dash lines outline the UEA-I<sup>+</sup> medullary region. The staining of UEA-I (upper left) was used to distinguish cortex (UEA-I<sup>-</sup>, marked as C) and medulla (UEA-I<sup>+</sup>, marked as M), outlined by the white dash line. Localization of IL-4 producing cells (huCD2<sup>+</sup>) together with B220<sup>+</sup> cells analyzed using histocytometric algorithm (lower row). (B) Immunofluorescent microcopy of thymic section of BALB/c KN2 mice (upper row), stained with DAPI, UEA-I, huCD2 and F4/80, the white dash lines outline the UEA-I<sup>+</sup> medullary region. The staining of UEA-I (upper left) was used to distinguish cortex (UEA-I<sup>-</sup>, marked as C) and medulla (UEA-I<sup>+</sup>, marked as M), outlined by the white dash line. Localization of IL-4 producing cells (huCD2<sup>+</sup>) together with F4/80<sup>+</sup> cells analyzed using histocytometric algorithm (lower row). (C) Minimum distance of each huCD2<sup>+</sup> cells to the nearest APC, a B220<sup>+</sup> or F4/80<sup>+</sup> cell. The numbers above columns indicate the average. Each dot represents a huCD2<sup>+</sup> cell and horizontal bars indicate mean values. Unpaired t test, \*\*\*\* $p < 0.0001$ .

**Suppl. Table 1. Cell type specificities of Cre and DTR transgenic mouse strains used in this study**

| <b>Cell type specificities of Cre and DTR transgenic mouse strains used in this study</b> |                                                                                  |                                                            |
|-------------------------------------------------------------------------------------------|----------------------------------------------------------------------------------|------------------------------------------------------------|
| <b>Mouse strains</b>                                                                      | <b>Cell type specificity</b>                                                     | <b>The Jackson Laboratory Stock NO.</b>                    |
| FoxN1Cre                                                                                  | thymic epithelial cells (TEC) and keratinocytes                                  | 018448                                                     |
| MB1Cre                                                                                    | B cells                                                                          | 020505                                                     |
| CD11cCre                                                                                  | classical dendritic cells (cDC), plasmacytoid dendritic cells (pDC), Macrophages | 008068                                                     |
| <i>Zbtb46</i> Cre                                                                         | classical dendritic cells (cDC)                                                  | 028538                                                     |
| BDCA2-DTR                                                                                 | plasmacytoid dendritic cells (pDC)                                               | 014176                                                     |
| LysMCre <sup>+</sup> <i>Csf1r</i> <sup>LSL-DTR+/-</sup>                                   | macrophages, monocytes                                                           | LysMCre: 004781<br><i>Csf1r</i> <sup>LSL-DTR</sup> : 24046 |

**Suppl. Table 2. Key recourses table**

| Key Resources Table                |                                                   |                              |                           |                        |
|------------------------------------|---------------------------------------------------|------------------------------|---------------------------|------------------------|
| Reagent type (species) or resource | Designation                                       | Source or reference          | Identifiers               | Additional information |
| antibody                           | anti-CD4                                          | BD Biosciences               | Cat # 563331              | (1:400)                |
| antibody                           | anti-CD8 $\alpha$                                 | BD Biosciences               | Cat # 563786              | (1:400)                |
| antibody                           | anti-CD24                                         | BioLegend                    | Cat # 101824              | (1:200)                |
| antibody                           | anti-CD44                                         | TONBO Biosciences            | Cat # 80-0441-U025        | (1:200)                |
| antibody                           | anti-human CD2                                    | BioLegend                    | Cat # 309218              | 5 $\mu$ L/test         |
| antibody                           | anti-TCR $\beta$                                  | BD Biosciences               | Cat # 563221              | (1:200)                |
| antibody                           | anti-PD-1                                         | BioLegend                    | Cat # 135213              | (1:100)                |
| antibody                           | anti-CD45.1                                       | BioLegend                    | Cat # 110738              | (1:200)                |
| antibody                           | anti-CD45.2                                       | eBioscience                  | Cat # 11-0454-81          | (1:200)                |
| antibody                           | anti-CD45                                         | eBioscience                  | Cat # 25-0451-82          | (1:200)                |
| antibody                           | anti-B220                                         | BioLegend                    | Cat # 103244              | (1:200)                |
| antibody                           | anti-CD11c                                        | eBioscience                  | Cat # 47-0114-82          | (1:200)                |
| antibody                           | anti-CD11b                                        | eBioscience                  | Cat # 47-0112-82          | (1:200)                |
| antibody                           | anti-F4/80                                        | eBioscience                  | Cat # 47-4801-82          | (1:200)                |
| antibody                           | anti-CD122                                        | BD Biosciences               | Cat # 562960              | (1:100)                |
| antibody                           | anti-PLZF                                         | BD Biosciences               | Cat # 563490              | (1:200)                |
| antibody                           | anti-ROR- $\gamma$ t                              | BD Biosciences               | Cat # 562684              | (1:200)                |
| antibody                           | anti-T-bet                                        | BioLegend                    | Cat # 644824              | (1:200)                |
| antibody                           | anti-Mertk                                        | BioLegend                    | Cat # 151504              | (1:200)                |
| antibody                           | anti-CD1d                                         | eBioscience & BD Biosciences | Cat # 12-0011-81 & 553846 | (1:200)                |
| antibody                           | anti-CD19                                         | TONBO Biosciences            | Cat # 60-0193-U100        | (1:200)                |
| antibody                           | anti-PDCA-1                                       | BioLegend                    | Cat # 127106              | (1:200)                |
| antibody                           | anti-Thy1.2                                       | eBiosciences                 | Cat # 47-0902-82          | (1:400)                |
| antibody                           | anti-SiglecF                                      | BD Biosciences               | Cat # 740280              | (1:200)                |
| antibody                           | anti-Ly6G                                         | BioLegend                    | Cat # 127610              | (1:200)                |
| antibody                           | anti-MHC-II                                       | BioLegend                    | Cat # 107653              | (1:1000)               |
| antibody                           | anti-EpCAM                                        | BioLegend                    | Cat # 118214              | (1:200)                |
| antibody                           | Goat-anti-R Phycoerythrin (PE)                    | Abcam                        | Cat # ab34721             | (1:200)                |
| antibody                           | whole rabbit sera anti-R Phycoerythrin (PE)       | Novus Biologicals            | Cat # NB120-7011          | (1:200)                |
| antibody                           | Donkey-anti-Rabbit AF555 & Goat-anti-Rabbit AF555 | Invitrogen                   | Cat # A31572 & A21429     | (1:400)                |
| antibody                           | Donkey-anti-Goat AF555                            | Invitrogen                   | Cat # A21432              | (1:400)                |
| Other                              | Ulex Europaeus Agglutinin I (UEA I)               | VECTOR LABORATORY            | FL-1061                   | (1:200)                |
| Other                              | Streptavidin PE                                   | Invitrogen                   | Cat # S21388              |                        |
| commercial assay or kit            | Viability dye Ghost Dye™ Red 780                  | TONBO Biosciences            | Cat # 13-0865-T100        | (1:500)                |
| commercial assay or kit            | Magnetic columns                                  | Miltenyi                     | Cat # 130-042-401         |                        |
| commercial assay or kit            | anti-PE microbeads                                | Miltenyi                     | Cat # 130-048-801         |                        |
| commercial assay or kit            | tyramide amplification kit                        | PerkinElmer                  | Cat # NEL745001KT         |                        |

|                         |                   |                        |                                                                                               |                |
|-------------------------|-------------------|------------------------|-----------------------------------------------------------------------------------------------|----------------|
| chemical compound, drug | Collagenase D     | Roche                  | Cat # 11088882001                                                                             | 1mg/mL         |
| chemical compound, drug | Mouse serum       | Jackson ImmunoResearch | Cat # 015-000-120                                                                             | 5 $\mu$ L/test |
| chemical compound, drug | DNase I           | Roche                  | Cat # 10104159001                                                                             | 100 U/ml       |
| chemical compound, drug | Liberase TH       | Roche                  | Cat # 5401127001                                                                              | 0.05% [w/v]    |
| chemical compound, drug | Diphtherial toxin | Sigma-Aldrich          | Cat # D0564                                                                                   | Diluted in PBS |
| software, algorithm     | Prism 7           | GraphPad               | <a href="https://www.graphpad.com/">https://www.graphpad.com/</a>                             |                |
| software, algorithm     | ImageJ            | ImageJ                 | <a href="https://imagej.nih.gov/ij/">https://imagej.nih.gov/ij/</a>                           |                |
| software, algorithm     | FlowJo v10        | TreeStar - Flowjo      | <a href="https://www.flowjo.com/solutions/flowjo">https://www.flowjo.com/solutions/flowjo</a> |                |

## Reference

1. Lee YJ, Holzapfel KL, Zhu J, Jameson SC, & Hogquist KA (2013) Steady-state production of IL-4 modulates immunity in mouse strains and is determined by lineage diversity of iNKT cells. *Nature immunology* 14(11):1146-1154.
2. Wang H, *et al.* (2018) Ultrasound Guided Intra-thymic Injection to Track Recent Thymic Emigrants and Investigate T Cell Development. *Bio-protocol* 8(23):e3107.
3. Xing Y & Hogquist KA (2014) Isolation, identification, and purification of murine thymic epithelial cells. *Journal of visualized experiments : JoVE* (90):e51780.
4. Gerner MY, Kastenmuller W, Ifrim I, Kabat J, & Germain RN (2012) Histo-cytometry: a method for highly multiplex quantitative tissue imaging analysis applied to dendritic cell subset microanatomy in lymph nodes. *Immunity* 37(2):364-376.
5. Lee YJ, *et al.* (2015) Tissue-Specific Distribution of iNKT Cells Impacts Their Cytokine Response. *Immunity* 43(3):566-578.
